# Supplementary material
Source: PubMed Central journal article supplement (PMC8665140)
Supplement: NIHMS1757445-supplement-5.pdf [file NIHMS1757445-supplement-5.pdf]

1 **Supplemental Table S1. Primers used for PCR amplification of the gene deletion constructs**  
 2 **and for mutant screening.**

| <b>Primers</b> | <b>Sequence (5' to 3')</b>                             |
|----------------|--------------------------------------------------------|
| Vam6-1         | TGGCTGACTCTTGACCCACCTCGAGCT                            |
| Vam6-2         | GATGGCCAGGTGAGGAGACAATGGGAGAGCTGCGAGGATGTGAGCT         |
| Vam6-3         | AGCTCACATCCTCGCAGCTCTCCCATTGTCTCCTCACCTGGCCATC         |
| Vam6-4         | TAGTTTCTACATCTCTTCGGTGAGTCTATATCTTGGGCGGGGTTTC         |
| Vam6-5         | GAAACCCCGCCCAAGATATAGACTCACCGAAGAGATGTAGAAACTA         |
| Vam6-6         | ACATGATCATGCCCATAGCCATAACATGCGA                        |
| Vam6-7NE       | CCGCACCGACCGTGCCTTTGCCGCCA                             |
| Vam6-8NE       | CTTGGCGGAGGGGAAGACGATGTGGC                             |
| Vam6-9PO       | GCAGCGTTGACGATCATGTTTGCCTAG                            |
| Vam6-10PO      | CCCACGAAGACGAGTATGACCACGCACAC                          |
| Vps3-1         | GACCGACGATGGTAACTGGACGACATGGA                          |
| Vps3-2         | TGGAGAAGGACCCCAATAGGATGCGCGCTGCGAGGATGTGAGCT           |
| Vps3-3         | AGCTCACATCCTCGCAGCGCGCATCTATTGGGGTCCTTCTCCA            |
| Vps3-4         | TAGTTTCTACATCTCTTCGCCATTACGGGGAATTGATGCTGGCCGGAC       |
| Vps3-5         | GTCCGGCCAGCATCAATTCCCCGTAATGGCGAAGAGATGTAGAAACTA       |
| Vps3-6         | CCCAAAGTGCCAAAATTGATACAGTCGT                           |
| Vps3-7NE       | CACTGCCCAGCCAGCTCACAATCCA                              |
| Vps3-8NE       | CATGGGCAGTGGGAGATGATGGAAGT                             |
| Vps3-9PO       | GAGGGTCTCGAGAGCCAGCCACCGCTGCA                          |
| Vps3-10PO      | AGTACAGGGAGGAGAGGTAGGAAGGTGAGC                         |
| Vps8-1         | GCAGCTGTCCACACTGGCCCTGTATTCT                           |
| Vps8-2         | TCTCCTGATCATCTCCATGATGCTGAAGGGGCTGCGAGGATGTGAGCT       |
| Vps8-3         | AGCTCACATCCTCGCAGCCCCTCAGCATCATGGAGATGATCAGGAGA        |
| Vps8-4         | TAGTTTCTACATCTCTTCGTTCTCGGGTCTGGCTCTGTCCTTAC           |
| Vps8-5         | GTGAAGGACAGAGCCAGACCCGAGAACGAAGAGATGTAGAAACTA          |
| Vps8-6         | GCCCAAGGGCGTTATGTTGAGATCGCA                            |
| Vps8-7NE       | GCGATACCCTCGACCCTTACATCA                               |
| Vps8-8NE       | CTCTCACATGCAAGCGATTGCCGTGGA                            |
| Vps8-9-PO      | CTCTGTCCGCACTAGCTCGTCA                                 |
| Vps8-10PO      | CACCAACCGTGCAAAGCATGACGCT                              |
| Vps41-1        | GATCAAGTACGTCCTCAACGAAC                                |
| Vps41-2        | AATTCTGCAGATATCCATCACATGGCGGCATGTCGTTATAAGGTGTATAGGATG |
| Vps41-3        | AATTCCAGCACACTGGCGGCCGTTACTAGTAGTTTGTATCGTTATGCATTTATA |
| Vps41-4        | GCGCACACGTCTGCATTTATCCTGA                              |

---

|                |                                 |
|----------------|---------------------------------|
| <b>Vps41-5</b> | GTCGTTTATCGAGGATGAGGAC          |
| <b>Vps41-6</b> | TCAAGCCACATTACCCTTCTCT          |
| <b>Vps41-7</b> | TACAGCAGATTA AAAAGGTCGGATAC     |
| <b>Vps41-8</b> | TCTTGGTCTTACAAGATCATTAGCC       |
| <b>NAT3L</b>   | GCCACTCGAATCCTGCATGCTTATGTGAGT  |
| <b>NAT5R</b>   | CAGCAACGCCGTTGAATCCTCAGGATCTTCA |

3  
4  
5

6 **Supplemental Table S2. Primers for constructing gene fusions for Cft1-mCherry, Vps3-**  
7 **mCherry and Vam3-mCherry expression.**

8

| Primer name      | Sequence (5'→3')                                                   |
|------------------|--------------------------------------------------------------------|
| Cft1-mChe-1F     | GACTGGAGATGGGCCTGGTTTCGTTCCA                                       |
| Cft1-mChe-1R     | TCCTCCTCGCCCTTGCTCACCACATGCCTCCCCAACGCCGCAACG                      |
| Cft1-mChe-2F     | CGTTGCGGCGTTGGGGAGGCATGTGGTGAGCAAGGGCGAGGAGGA                      |
| Cft1-mChe-2R     | ACACACTTCATACGATGGGCATGTACCACGACGTTGTAAAACGACGGCCAG                |
| Cft1-mChe-3F     | CTGGCCGTCGTTTTACAACGTCGTGGTACATGCCCATCGTATGAAGTGTGT                |
| Cft1-mChe-3R     | TGCGCATCATGACACGGCGGGAATGGT                                        |
| Vam6-mChe-P1F    | ACATCCTTCCTCTCCTCCATCGACCGAA                                       |
| Vam6-mChe-P1R    | ATGTTATCCTCCTCGCCCTTGCTCACCACCATTCTCTGATCCGTCACCCTTACCCTC          |
| Vam6-mChe-P2F    | GAGGGTAAGGGTGACGGATCAGAGAATGGTGGTGAGCAAGGGCGAGGAGGATAA<br>CAT      |
| Vam6-mChe-P3R    | GCCCAGTCTCTTGTGGCATTGCGGACATCTGTACGACGTTGTAAAACGACGGCCA<br>GT      |
| Vam6-mChe-P4F    | ACTGGCCGTCGTTTTACAACGTCGTGACAGATGTCCGCAATGCCACAAGAGACTG<br>GGC     |
| Vam6-mChe-P4R    | CCTAATACCCAAACTGTAGGATACTACTCGGT                                   |
| Vam6-mChe-PO-9F  | CACAGCCGACGAACCCGAGATCGA                                           |
| Vam6-mChe-PO-10R | AGCCGTGAGTCCCTTTTTGAGGAATGGTTA                                     |
| Vps3-mChe-P1F    | TGCAGGAATCAAGGGCAAGGAGAGGGAAACGT                                   |
| Vps3-mChe-P1R    | ATGTTATCCTCCTCGCCCTTGCTCACCACGACATGGCGTGTCCGGCCAGCATCAAT<br>TCCCCG |
| Vps3-mChe-P2F    | CGGGGAATTGATGCTGGCCGGACACGCCATGTCTGGTGAGCAAGGGCGAGGAGG<br>ATAACAT  |
| Vps3-mChe-P3R    | ACAACAGTATTACAATATGATACAGTGGTGATCACGACGTTGTAAAACGACGGCC<br>AG      |
| Vps3-mche-P4F    | CTGGCCGTCGTTTTACAACGTCGTGATCACCCTGTATCATATTGTAATACTGTTGT           |
| Vps3-mche-P4R    | ATGCGAATGGTAGTGAAGCGAGTACAGGGA                                     |
| Vps3-mche-PO-9F  | GTAGACGATGGTGTCAAATACCAT                                           |
| Vps3-mChe-PO-10R | CCGACTATAACAAATGGAGAGCGAGA                                         |

9

10

11

12 **Supplemental Table S3. Primers used for quantitative PCR to examine gene expression in**  
13 **the WT strain and the *vps3Δ* and *vam6Δ* mutants.**

---

| <b>Primers</b> | <b>Sequence (5' to 3')</b> |
|----------------|----------------------------|
| Cft1For        | GGATATAAATCCGCCGCTCTT      |
| Cft1Rev        | TTCCTTGGCCCTCTTCTCTC       |
| SIT1For        | GCCGCCATTTGGACCAA          |
| SIT1Rev        | GCACGGAGGAGGTCGTTGTA       |
| ACT1For        | CCACACTGTCCCCATTTACGA      |
| ACT1Rev        | CAGCAAGATCGATACGGAGGAT     |
| PHO89-f        | AGCTGGGATCGTCCATCACT       |
| PHO89-r        | GTGCTGACAGGGATGCCATA       |
| cf01-f1        | GGACCTTGGCCGCTCAA          |
| cf01-r1        | CAAGCGCGCCAATCG            |
| CIG1For        | GGTGGTCCGGTTTCCTTCA        |
| Cig1Rev        | GACTCGTGGTCGTGCATAACA      |

---

14

15
